# Supplementary material for: Age-related change in sit-to-stand power in Japanese women aged 50 years or older
Source: Springer Nature journal article supplement (doi:10.1186/1880-6805-33-26), 2014-08-16

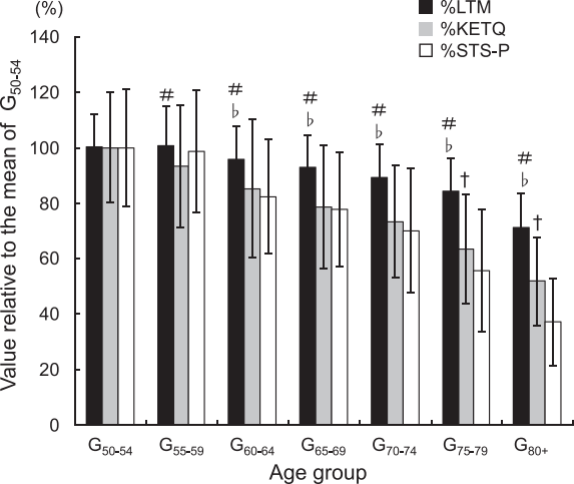

Supplement: 40101_2014_91_MOESM2_ESM.pdf [file 40101_2014_91_MOESM2_ESM.pdf]
