# Supplementary material for: Age-related change in sit-to-stand power in Japanese women aged 50 years or older
Source: Springer Nature journal article supplement (doi:10.1186/1880-6805-33-26), 2014-08-16
Supplement: 40101_2014_91_MOESM3_ESM.pdf [file 40101_2014_91_MOESM3_ESM.pdf]

Table 2 Descriptive data on muscle thickness (MT), knee extension torque (KETQ), estimated lean tissue mass (LTM), time for sit to stand test (STS-T), and sit to stand power (STS power)

| Variables           | Age group                    |                              |                               |                               |                               |                              |                            |
|---------------------|------------------------------|------------------------------|-------------------------------|-------------------------------|-------------------------------|------------------------------|----------------------------|
|                     | G <sub>50-54</sub><br>n = 32 | G <sub>55-59</sub><br>n = 56 | G <sub>60-64</sub><br>n = 112 | G <sub>65-69</sub><br>n = 151 | G <sub>70-74</sub><br>n = 126 | G <sub>75-79</sub><br>n = 57 | G <sub>80+</sub><br>n = 22 |
| MT, cm              |                              |                              |                               |                               |                               |                              |                            |
| Thigh anterior      | 4.4 (0.6)                    | 4.3 (0.6)                    | 4.1 (0.6)                     | 3.8 (0.5)                     | 3.7 (0.5)                     | 3.4 (0.4)                    | 3.0 (0.5)                  |
| Thigh posterior     | 5.7 (0.5)                    | 5.7 (0.7)                    | 5.8 (0.7)                     | 5.7 (0.7)                     | 5.5 (0.8)                     | 5.5 (0.7)                    | 4.9 (0.8)                  |
| Lower leg anterior  | 2.6 (0.2)                    | 2.6 (0.3)                    | 2.7 (0.2)                     | 2.6 (0.3)                     | 2.5 (0.3)                     | 2.5 (0.2)                    | 2.3 (0.3)                  |
| Lower leg posterior | 6.0 (0.4)                    | 6.0 (0.5)                    | 6.0 (0.5)                     | 6.0 (0.5)                     | 5.9 (0.4)                     | 5.9 (0.5)                    | 5.4 (0.5)                  |
| LTM, kg             | 6.7 (0.8)                    | 6.7 (1.0)                    | 6.4 (0.8)                     | 6.2 (0.8)                     | 5.9 (0.8)                     | 5.6 (0.8)                    | 4.8 (0.8)                  |
| KETQ, Nm            | 90.5 (17.9)                  | 84.4 (20.0)                  | 77.1 (22.5)                   | 70.9 (20.0)                   | 66.5 (18.3)                   | 57.4 (17.7)                  | 47.0 (14.2)                |
| STS-T, s            | 9.8 (2.0)                    | 10.4 (2.0)                   | 11.8 (3.2)                    | 12.2 (3.6)                    | 13.9 (5.1)                    | 16.6 (6.1)                   | 24.0 (9.4)                 |
| STS power, W        | 159.8 (33.8)                 | 157.3 (35.3)                 | 131.7 (33.1)                  | 124.4 (32.8)                  | 111.9 (35.6)                  | 89.0 (35.1)                  | 59.2 (25.1)                |

Values are means (SD).
